# Supplementary material
Source: publisher site journal article supplement (https://study.sagepub.com/sites/default/files/supplemental_online_code.zip)
Supplement: Supplementary file 4 [file supplemental_online_code.zip]

# Chapter 7 - Univariate and Descriptive Statistics

## Supplemental Code

Brian Fogarty

This document provides the code for creating the SAT, Wayne County, and St. Louis City histograms that appear in Chapter 7.

### SAT Histogram

```
library(tidyverse)
library(scales)

sat <- read_csv("sat_unis.csv")
glimpse(sat)

Rows: 1,278
Columns: 2
$ uni      <chr> "Alabama A & M University", "University of Alabama at Birmingh~
$ sat_avg  <dbl> 939, 1234, 1319, 946, 1261, 1082, 1300, 1230, 1066, 1076, 1084~

sat %>%
ggplot() +
  geom_histogram(mapping = aes(sat_avg, y = stat(density)),
                 binwidth = 20, alpha = 1/2) +
  theme_minimal() +
  scale_y_continuous(labels = percent_format()) +
  geom_vline(xintercept = 1140, size = 1.5, colour = "red") +
  labs(x="Average SAT Scores", title="Average SAT Scores Among U.S. Universities",
       y="Percentage", caption="Red vertical line is the mean.")
```

Average SAT Scores Among U.S. Universities

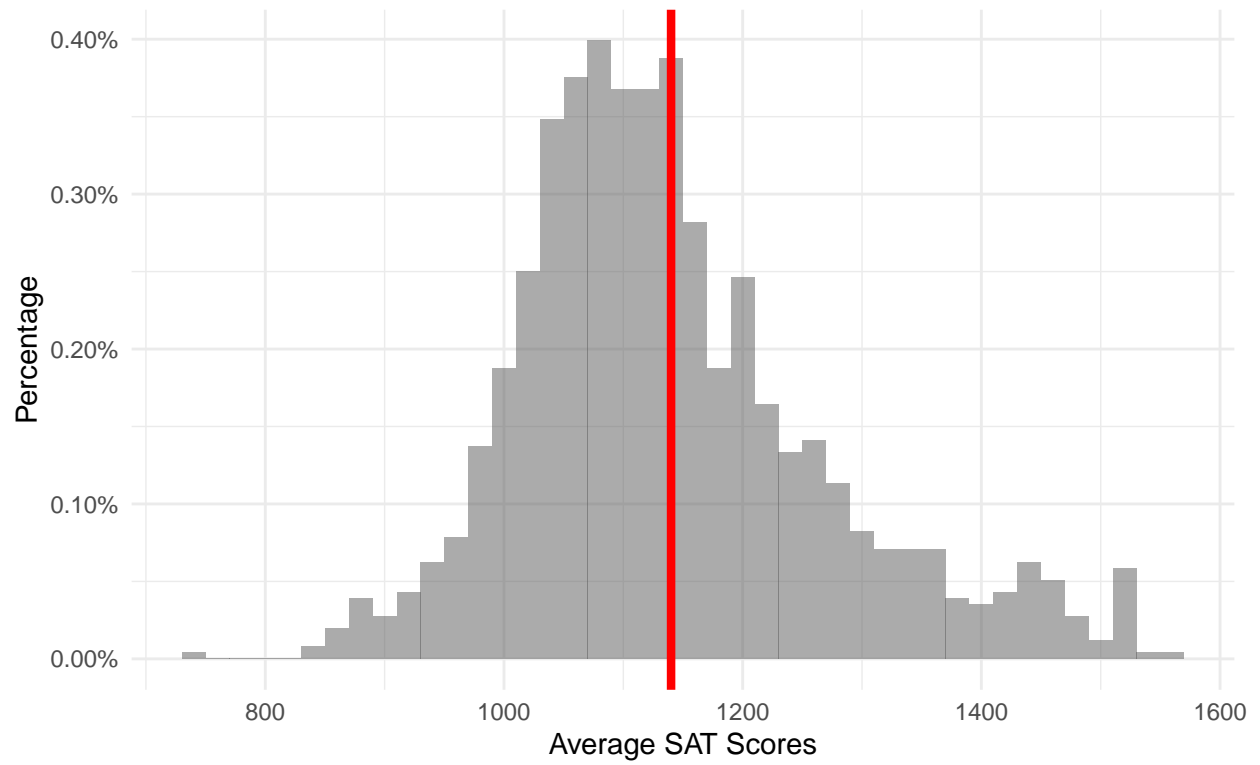

Red vertical line is the mean.

## Wayne County, MI Histogram

```
library(readxl)
wayne <- read_xlsx("wayne_voting_precincts.xlsx")
glimpse(wayne)
```

```
Rows: 981
Columns: 3
$ Label      <chr> "Voting District 1632200005125, Wayne County, Michigan", "Vo~
$ white_pct  <dbl> 8.450704, 62.903226, 76.329114, 75.844516, 76.531165, 83.632~
$ black_pct  <dbl> 87.3239437, 14.2559834, 5.4430380, 3.7945396, 4.7696477, 2.8~
```

```
library(patchwork)

p1 <- wayne %>%
  ggplot() +
    geom_histogram(mapping = aes(white_pct, y = stat(density)),
                   binwidth = 1, alpha = 1/2) +
    theme_minimal() +
    scale_y_continuous(labels = percent_format()) +
    geom_vline(xintercept = 39, size = 1.5, colour = "red") +
    labs(x="Percentage of White Residents in Precinct",
         title="White Residents % by Precinct in Wayne County",
         y="Percentage", caption="Red vertical line is the mean.") +
    theme(
      plot.title = element_text(size = 12)
    )

p2 <- wayne %>%
  ggplot() +
    geom_histogram(mapping = aes(black_pct, y = stat(density)),
                   binwidth = 1, alpha = 1/2) +
    theme_minimal() +
    scale_y_continuous(labels = percent_format()) +
    geom_vline(xintercept = 50, size = 1.5, colour = "red") +
    labs(x="Percentage of Black Residents in Precinct",
         title="Black Residents % by Precinct in Wayne County",
         y="Percentage", caption="Red vertical line is the mean.") +
    theme(
      plot.title = element_text(size = 12)
    )

p1 / p2
```

White Residents % by Precinct in Wayne County

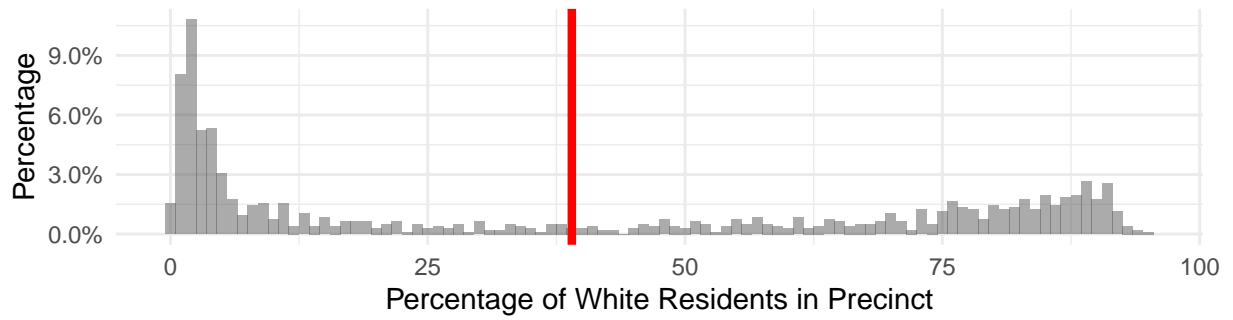

Red vertical line is the mean.

Black Residents % by Precinct in Wayne County

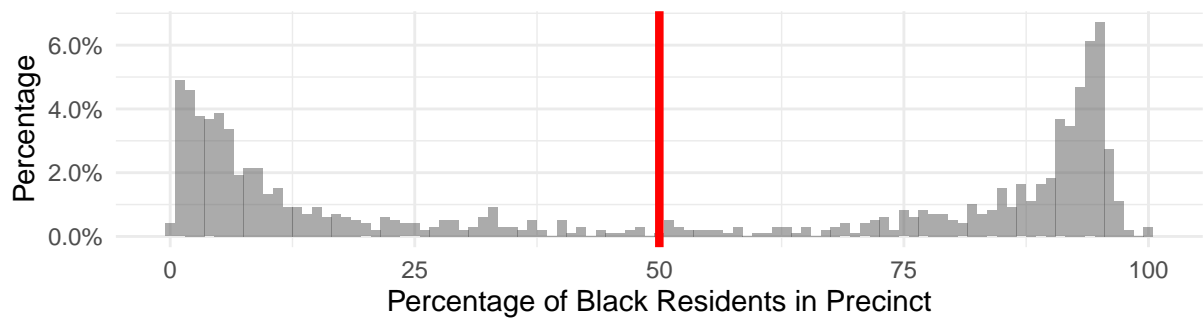

Red vertical line is the mean.

## St. Louis City, MO Histogram

```
stl <- read_xlsx("stl_voting_precincts.xlsx")
glimpse(stl)
```

Rows: 223

Columns: 3

```
$ Label      <chr> "STL 1-2 Voting District, St. Louis city, Missouri", "STL 1--
$ white_pct  <dbl> 1.0777521, 3.4985423, 1.5497553, 2.3405973, 10.0783875, 0.62~
$ black_pct  <dbl> 95.53503, 92.41983, 97.30832, 92.09040, 85.94625, 93.16770, ~
```

```
p3 <- stl %>%
  ggplot() +
    geom_histogram(mapping = aes(white_pct, y = stat(density)),
                   binwidth = 1, alpha = 1/2) +
    theme_minimal() +
    scale_y_continuous(labels = percent_format()) +
    geom_vline(xintercept = 40, size = 1.5, colour = "red") +
    labs(x="Percentage of White Residents in Precinct",
         title="White Residents % by Precinct in St. Louis",
         y="Percentage", caption="Red vertical line is the mean.") +
    theme(
      plot.title = element_text(size = 12)
    )
```

```
p4 <- stl %>%
  ggplot() +
    geom_histogram(mapping = aes(black_pct, y = stat(density)),
                   binwidth = 1, alpha = 1/2) +
    theme_minimal() +
    scale_y_continuous(labels = percent_format()) +
    geom_vline(xintercept = 48, size = 1.5, colour = "red") +
    labs(x="Percentage of Black Residents in Precinct",
         title="Black Residents % by Precinct in St. Louis",
         y="Percentage", caption="Red vertical line is the mean.") +
    theme(
      plot.title = element_text(size = 12)
    )
```

p3 / p4

White Residents % by Precinct in St. Louis

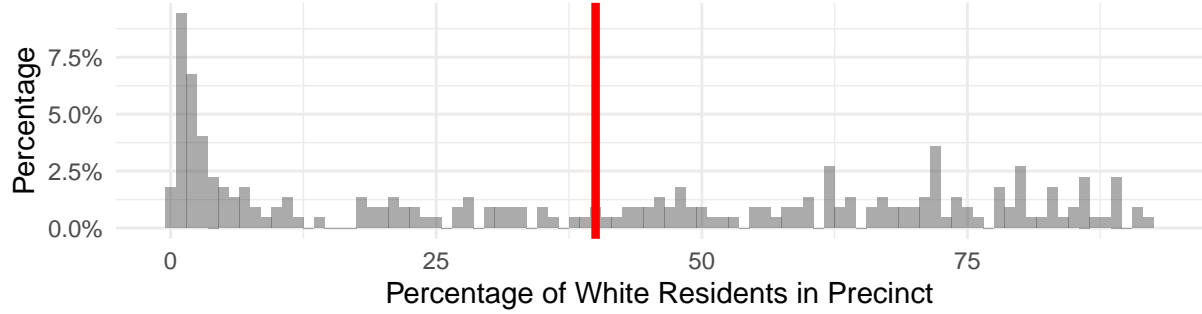

Red vertical line is the mean.

Black Residents % by Precinct in St. Louis

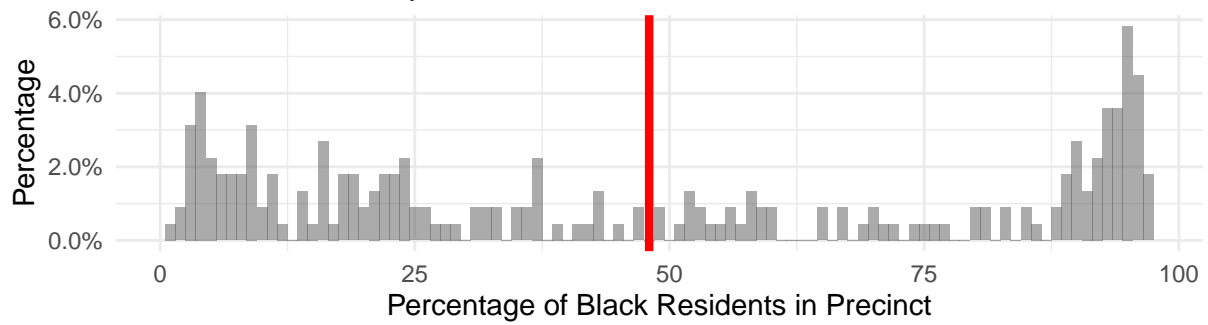

Red vertical line is the mean.
